# Supplementary material for: Optical Biomarkers for the Diagnosis of Osteoarthritis through Raman Spectroscopy: Radiological and Biochemical Validation Using Ex Vivo Human Cartilage Samples
Source: PubMed Central journal article supplement (PMC8003208; doi:10.3390/diagnostics11030546), 2021-03-18
Supplement: diagnostics-11-00546-s001.pdf [file diagnostics-11-00546-s001.pdf]

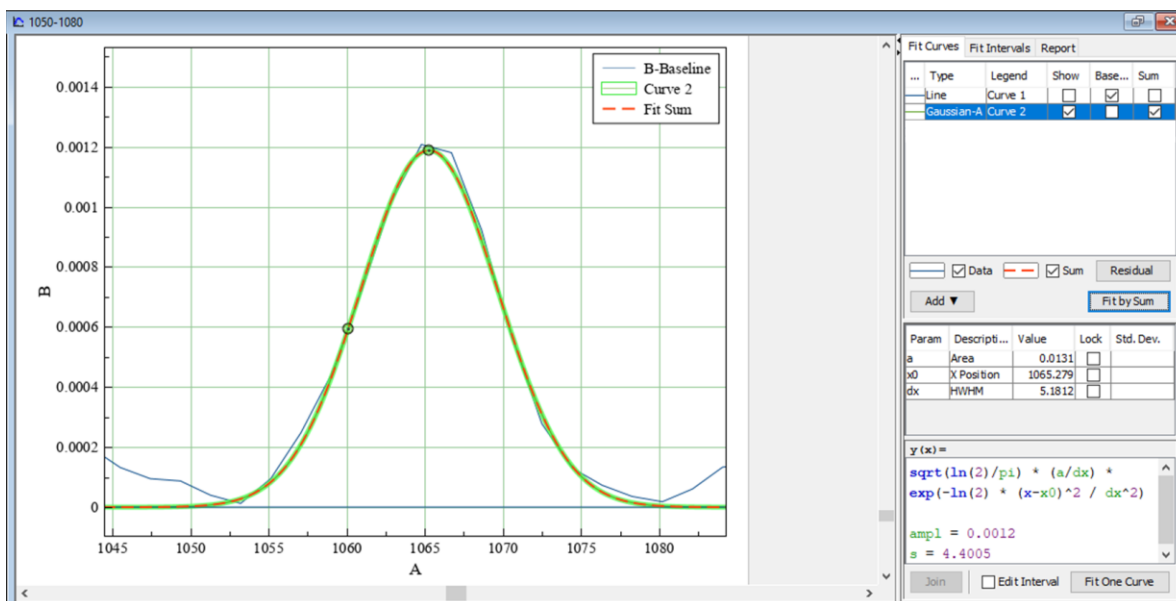

**Figure S1.** Example of area measurement by MagicPlot software, in wavenumber range 1045–1080 cm<sup>-1</sup>, of a Raman spectrum from an arbitrary cartilage sample.
